# Supplementary material
Source: PubMed Central journal article supplement (PMC7097909)
Supplement: ao9b03848_si_001.pdf [file ao9b03848_si_001.pdf]

**Title of Manuscript:** Peptide Combination Generator: A tool for generating peptide combinations.

**Authors:** Naseem Ali, Arzoo Shamoan, Neelesh Yadav\*, Tanuj Sharma\*

**Affiliation:** Bioinformatics Center, Forest Research Institute, Dehradun, Uttarakhand, 248006, India.

**Supplementary Data:**

**Table s1:** The table summarizes the twenty amino acids differentiated into six broad group, along with three letter and single letter code.

| Sr. No. | Nature                  | Name of Residue                                            | Three Letter Code               | Single Letter Code    |
|---------|-------------------------|------------------------------------------------------------|---------------------------------|-----------------------|
| 1       | Acidic                  | Aspartic Acid<br>Glutamic Acid                             | Asp<br>Glu                      | D<br>E                |
| 2.      | Basic                   | Arginine<br>Histidine<br>Lysine                            | Arg<br>His<br>Lys               | R<br>H<br>K           |
| 3.      | Hydrophobic (Aliphatic) | Alanine<br>Isoleucine<br>Leucine<br>Methionine<br>Valine   | Ala<br>Ile<br>Leu<br>Met<br>Val | A<br>I<br>L<br>M<br>V |
| 4.      | Aromatic                | Phenylalanine<br>Tryptophan<br>Tyrosine                    | Phe<br>Trp<br>Tyr               | F<br>W<br>Y           |
| 5.      | Polar (Uncharged)       | Asparagine<br>Cysteine<br>Glutamine<br>Serine<br>Threonine | Asn<br>Cys<br>Gln<br>Ser<br>Thr | N<br>C<br>Q<br>S<br>T |
| 6.      | Unique                  | Glycine<br>Proline                                         | Gly<br>Pro                      | G<br>P                |

## Images:

The image shows the main web server front page for the Peptide Combination Generator. At the top, there is a navigation bar with links for 'About', 'Feedback', and 'Contact Us'. The main heading is 'Peptide Combination Generator' with a subtext: 'A tool for generating all the possible combinations that a particular peptide sequence can acquire owing to its physicochemical properties.' Below this, there are two main sections: 'Basic Module' and 'Advanced Module'. The 'Basic Module' section states: 'Only calculate and list out all the possible peptide combinations.' The 'Advanced Module' section states: 'Calculates combinations upto 0.1 million along with other properties including: Molecular Weight, Net Charge, Solubility, Isoelectric Point, Hydropathy Index, 3D Model of each combinations.' At the bottom of the page, there is a footer with copyright information: '© All Rights Reserved. Biorxiv Research Institute, Dehradun (India). Created & Developed By: Bioinformatics Centre, FRI, Dehradun. Total Visits: 10'. There is also a logo for the Department of Biotechnology, Ministry of Science & Technology, India.

Figure s 1: The image indicates the main web server front page, which can be used to access both basic and advanced module for generating peptide combinations (source: <https://www.bicfri.in/pepcogen/>)

The image shows the user input page for the Peptide Combination Generator. The main heading is 'Peptide Combination Generator' with the same subtext as in Figure s 1. Below the heading, there is a section labeled 'INPUT' with a form containing 'Number of Residues', 'Select Length' (a dropdown menu), and a 'Go' button. Below the input section, there is a section labeled 'RESULT'.

Figure s 2: The image indicates the user input page for both basic and advanced module of web server (source: <https://www.bicfri.in/pepcogen/basic/>).

# Peptide Combination Generator

A tool for generating all the possible combinations that a particular peptide sequence can acquire owing to its physiochemical properties.

INPUT

Number of Residues  Select Length

Select Length

- 4
- 5
- 6
- 7
- 8
- 9
- 10
- 11
- 12
- 13
- 14
- 15
- 16
- 17
- 18
- 19
- 20
- 21

RESULT

Figure s 3: The image indicates the drop down menu to select the length of peptides ranging from 4 to 21 (source: <https://www.bicfri.in/pepcogen/basic/>).

INPUT

Number of Residues

Position 1

Position 2

Position 3

Position 4

Position 5

Position 6

Position 7

RESULT

- Acidic**  
Aspartic Acid, Asp, D  
Glutamic Acid, Glu, E
- Basic**  
Arginine, Arg, R  
Histidine, His, H  
Lysine, Lys, K
- Hydrophobic (Aliphatic)**  
Alanine, Ala, A  
Isoleucine, Ile, I  
Leucine, Leu, L  
Methionine, Met, M  
Valine, Val, V
- Aromatic**  
Phenylalanine, Phe, F  
Tryptophan, Trp, W  
Tyrosine, Tyr, Y
- Polar Uncharged**  
Asparagine, Asn, N  
Cysteine, Cys, C  
Glutamine, Gln, Q  
Serine, Ser, S  
Threonine, Thr, T
- Unique**  
Glycine, Gly, G  
Proline, Pro, P

Figure s 4: The image indicates the various positions for the peptide sequence (length 7) which have to selected for combinations with amino acids having similar physiochemical properties (source: <https://www.bicfri.in/pepcogen/basic/>).

## ===== RESULT =====

| S.No. | Combination |
|-------|-------------|
| 1     | DRAFSGT     |
| 2     | DRAFSPPT    |
| 3     | DRAFTGT     |
| 4     | DRAFTPT     |
| 5     | DRAFCGT     |
| 6     | DRAFCPT     |
| 7     | DRAFNGT     |
| 8     | DRAFNPPT    |
| 9     | DRAFQGT     |
| 10    | DRAFQPT     |
| 11    | DRAWSGT     |
| 12    | DRAWSPT     |
| 13    | DRAWTGT     |
| 14    | DRAWTPT     |
| 15    | DRAWCGT     |
| 16    | DRAWCPT     |
| 17    | DRAWNGT     |
| 18    | DRAWNPPT    |
| 19    | DRAWQGT     |
| 20    | DRAWQPT     |
| 21    | DRAYSGT     |
| 22    | DRAYSPT     |
| 23    | DRAVTGT     |

Figure s 5: The image indicates the result web page for basic module for calculating and listing out all the combination of the peptides (source: <https://www.bicfri.in/pepcogen/basic/>).

## ===== RESULT =====

Show 10 entries [Excel](#) [Pdf](#) Search:

| S.No. | Combination | Molecular Weight (Da) | Net Charge | Solubility            | Isoelectric Point (IPC Peptide) | Hydropathy Index | Model |
|-------|-------------|-----------------------|------------|-----------------------|---------------------------------|------------------|-------|
| 1     | DRAFSGA     | 722.77                | 0          | Poor Water Solubility | 6.73                            | Hydropathy Index | Model |
| 2     | DRAFSPA     | 762.83                | 0          | Poor Water Solubility | 6.73                            | Hydropathy Index | Model |
| 3     | DRAFTGA     | 736.80                | 0          | Poor Water Solubility | 6.73                            | Hydropathy Index | Model |
| 4     | DRAFTPA     | 776.86                | 0          | Poor Water Solubility | 6.73                            | Hydropathy Index | Model |
| 5     | DRAFCGA     | 738.84                | 0          | Poor Water Solubility | 6.09                            | Hydropathy Index | Model |
| 6     | DRAFCPA     | 778.90                | 0          | Poor Water Solubility | 6.09                            | Hydropathy Index | Model |
| 7     | DRAFNGA     | 749.80                | 0          | Poor Water Solubility | 6.73                            | Hydropathy Index | Model |
| 8     | DRAFNPA     | 789.86                | 0          | Poor Water Solubility | 6.73                            | Hydropathy Index | Model |
| 9     | DRAFQGA     | 763.83                | 0          | Poor Water Solubility | 6.73                            | Hydropathy Index | Model |
| 10    | DRAFQPA     | 803.89                | 0          | Poor Water Solubility | 6.73                            | Hydropathy Index | Model |

Showing 1 to 10 of 900 entries Previous **1** 2 3 4 5 ... 90 Next

Figure s 6: The image indicates the result web page for advanced module. Each peptide combination generated is followed by its molecular weight, net charge, solubility, isoelectric point, hydropathy index and a JSmol link for generating random 3D model (source: <https://www.bicfri.in/pepcogen/advanced/>).

**RESULT**

Show 10 entries [Excel](#) [Pdf](#) Search:

| S.No. | Combination | Molecular Weight (Da) | Net Charge | Solubility            | Isoelectric Point (IPC Peptide) | Hydropathy Index | Model |
|-------|-------------|-----------------------|------------|-----------------------|---------------------------------|------------------|-------|
| 1     | AAAAA       | 373.44                | 0          | Poor Water Solubility | 6                               | Hydropathy Index | Model |
| 2     | AAAVV       | 401.49                | 0          | Poor Water Solubility | 6                               | Hydropathy Index | Model |
| 3     | AAAAL       | 415.52                | 0          | Poor Water Solubility | 6                               | Hydropathy Index | Model |
| 4     | AAAAI       | 415.52                | 0          | Poor Water Solubility | 6                               | Hydropathy Index | Model |
| 5     | AAAAM       | 433.55                | 0          | Poor Water Solubility | 6                               | Hydropathy Index | Model |
| 6     | AAAVA       | 401.49                | 0          | Poor Water Solubility | 6                               | Hydropathy Index | Model |
| 7     | AAAVV       | 429.54                | 0          | Poor Water Solubility | 6                               | Hydropathy Index | Model |
| 8     | AAAVL       | 443.57                | 0          | Poor Water Solubility | 6                               | Hydropathy Index | Model |
| 9     | AAAVI       | 443.57                | 0          | Poor Water Solubility | 6                               | Hydropathy Index | Model |
| 10    | AAAVM       | 461.60                | 0          | Poor Water Solubility | 6                               | Hydropathy Index | Model |

Showing 1 to 10 of 3,125 entries Previous 1 2 3 4 5 ... 313 Next

Figure s 7: The image indicates the result web page for advanced module (source: <https://www.bicfri.in/pepcogen/advanced/>).

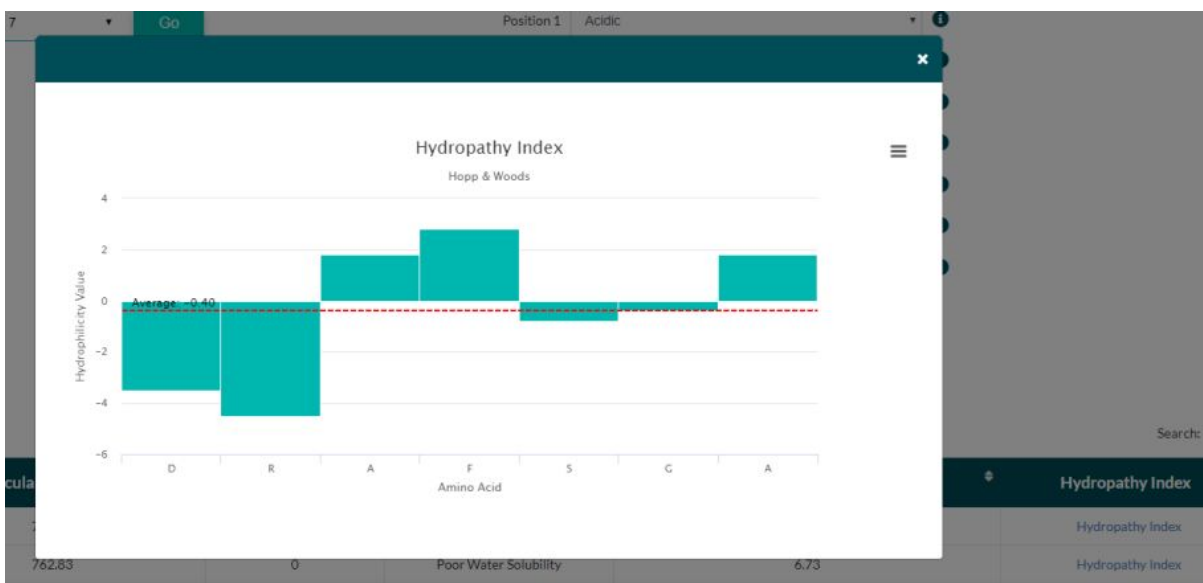

Figure s 8: The image indicates the hydropathy index of the generated peptide combination, by using the values of Hopp & Woods (source: <https://www.bicfri.in/pepcogen/advanced/>).



```

var len = (value.combination).length;
var comb = (value.combination).split("");

while (i<len) {
    if(jQuery.inArray(comb[i], pos_pKs) != -1) {
        q_pos +=1;
    }
    else if(jQuery.inArray(comb[i], neg_pKs) != -1) {
        q_neg += 1;
    }
    i++;
}
netcharge = q_pos-q_neg;

```

### Script s3:

```

//Solubility
solubility = netcharge==0?"Poor Water Solubility":"Soluble in Water";

```

### Script s4:

```

//Isoelectric point
$pK=array(
    "N_terminus"=>9.564, "K"=>10.517, "R"=>12.503, "H"=>6.018,"C_terminus"=>2.383,
    "D"=>3.887,"E"=>4.317, "C"=>8.297, "Y"=>10.071
);
$aminoacid_content=aminoacid_content($aminoacidsequence);
$charge=protein_isoelectric_point($pK,$aminoacid_content);
$result=round($charge,2);
function aminoacid_content($seq) {

$array=array("A"=>0,"R"=>0,"N"=>0,"D"=>0,"C"=>0,"E"=>0,"Q"=>0,"G"=>0,"H"=>0,"I"=>0,"L"=>
0,
    "K"=>0,"M"=>0,"F"=>0,"P"=>0,"S"=>0,"T"=>0,"W"=>0,"Y"=>0,"V"=>0);
...
return $array;
}
function protein_isoelectric_point($pK, $aminoacid_content) {
$pH=7; // pH value at start

```

```
$delta=4; // this parameter will be used to modify pH when charge!=0. The value of $delta will change during the loop
```

```
while(1) {  
    // compute charge of protein at corresponding pH (uses a function)  
    ...  
}  
return round($pH,2);  
}
```

### **Script s5:**

```
//hydropathy Index  
switch(split_val[i]) {  
    case 'A':  
        axisVal = 1.8;  
        break;  
    case 'C':  
        axisVal = 2.5;  
        break;  
    ...  
}  
highchart();
```
